# Supplementary material
Source: PubMed Central journal article supplement (PMC10861363)

# A COX2, cytochrome c oxidase subunit II (lemur)

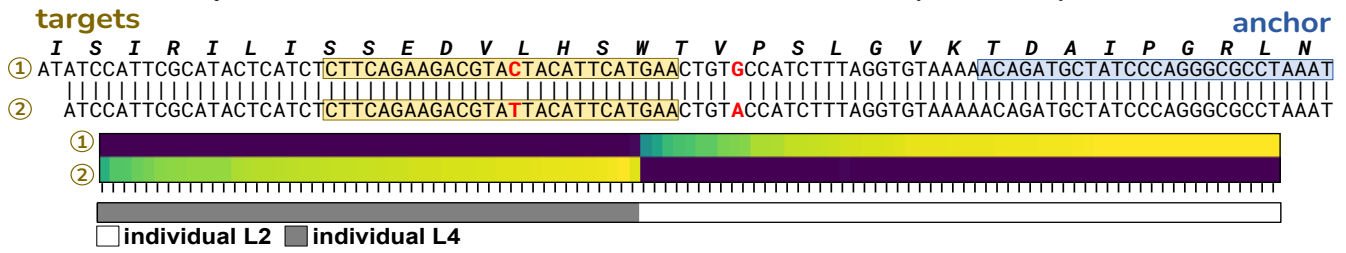

# B Ig lambda C-region (lemur)

anchor: TGGCGGAAGATGAAGACAGATGGTGC

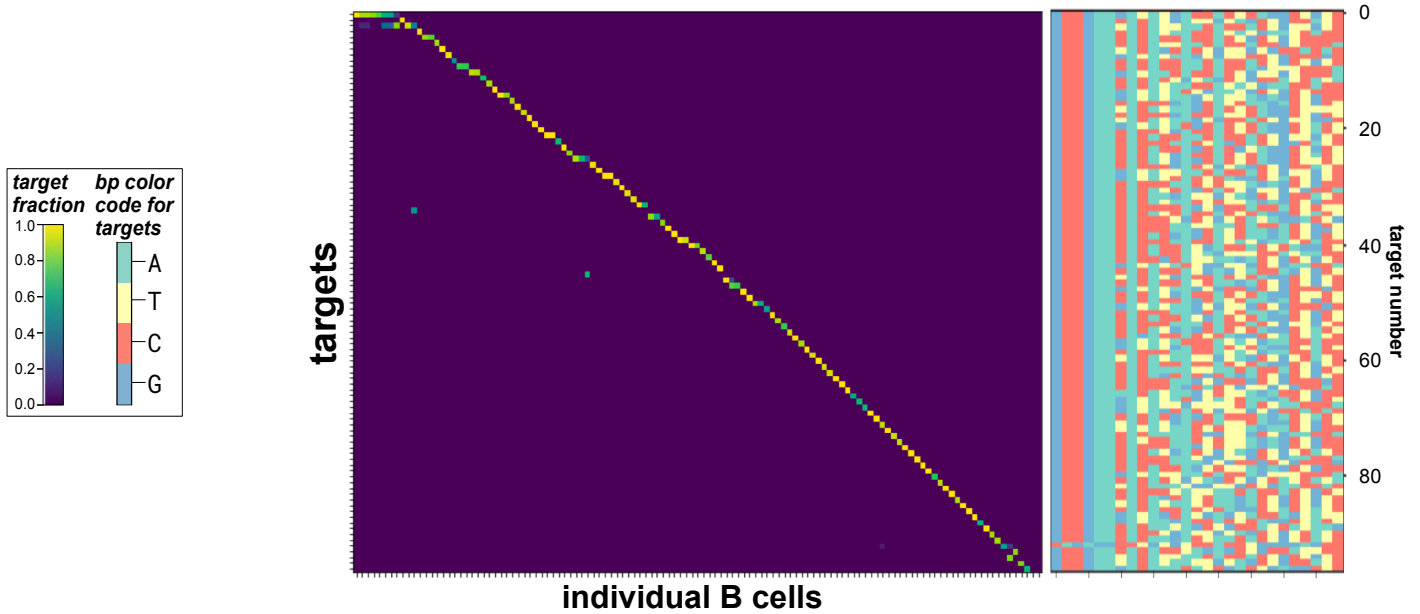

# C TCR-beta J-region (lemur)

anchor: CCGGGTCCCTGGCCCGAAGAAGACTGCTC

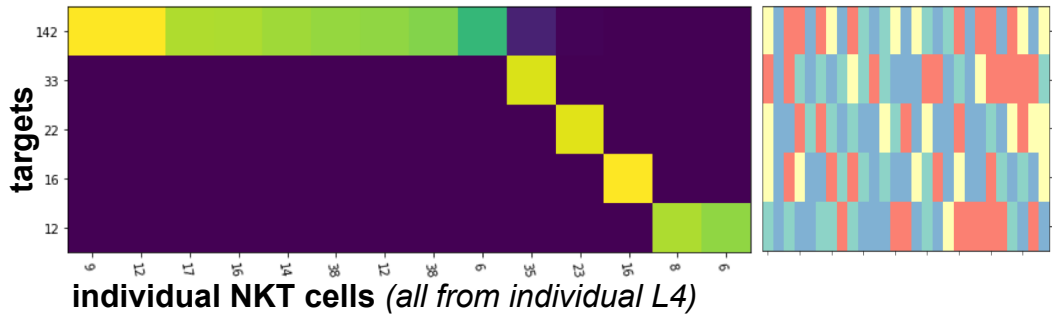

# D TCR-gamma V-region (lemur)

anchor: ACCCTACCATTACAAATGTAGAGAAA

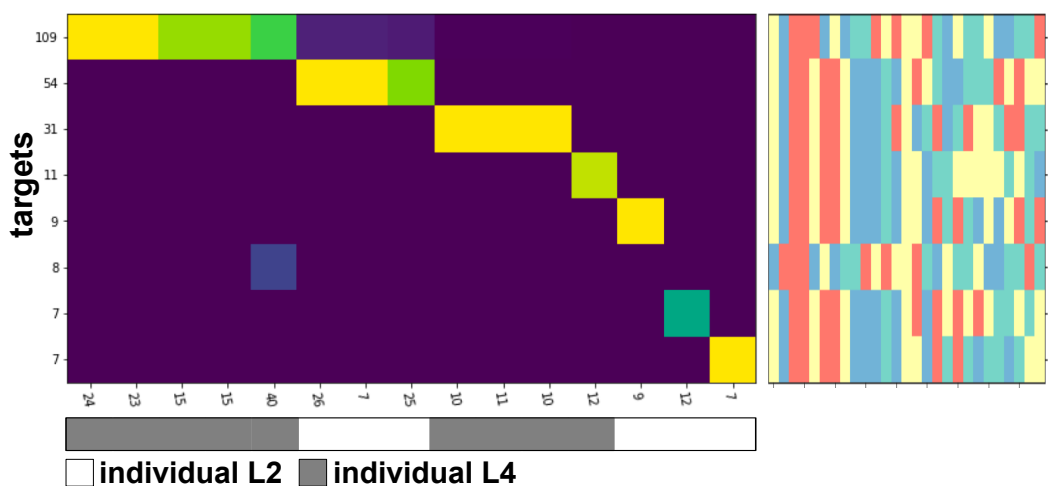

Supplement: NIHMS1949160-supplement-8.pdf [file NIHMS1949160-supplement-8.pdf]
