# Supplementary material
Source: PubMed Central journal article supplement (PMC10861363)

# A. p-value computation

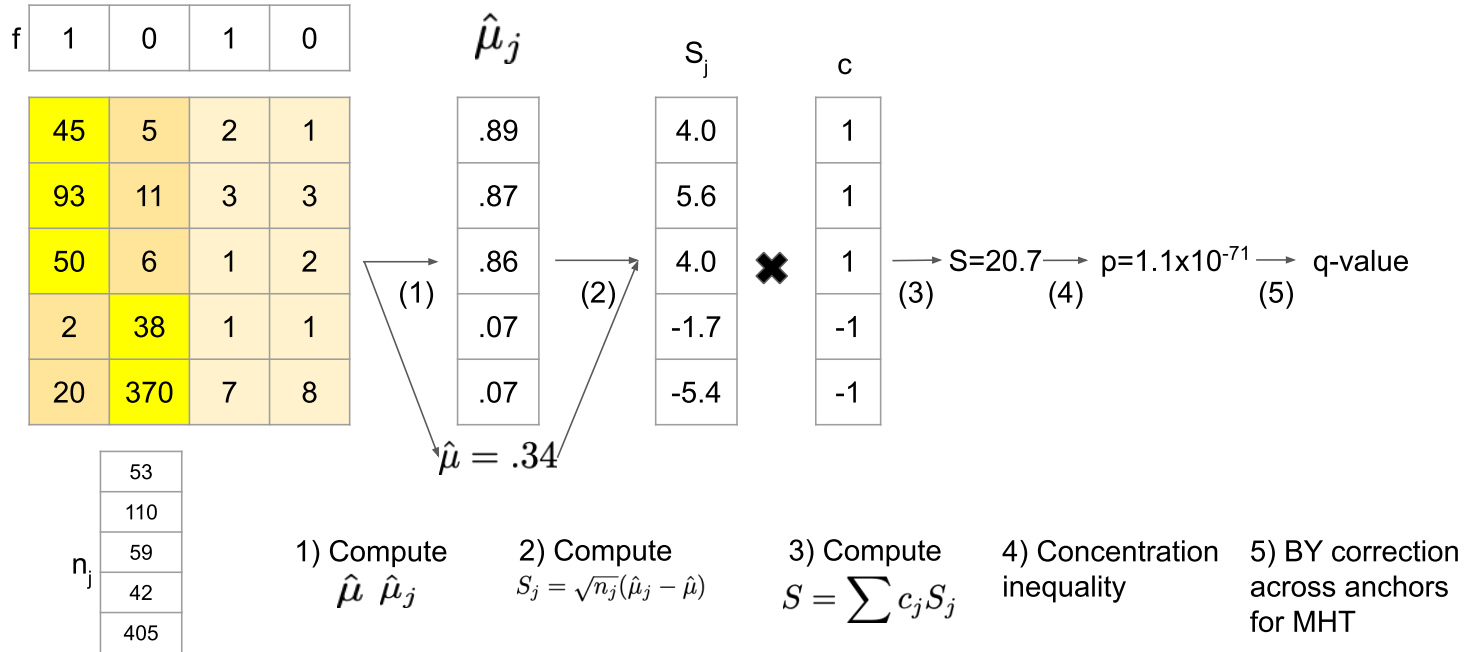

# B. effect size computation

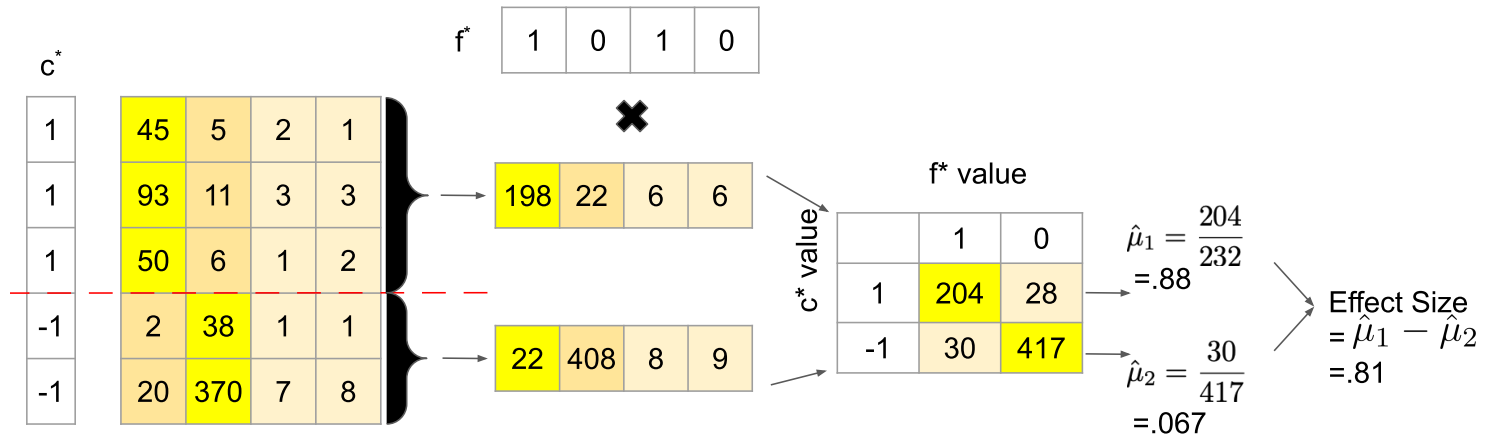

Supplement: NIHMS1949160-supplement-4.pdf [file NIHMS1949160-supplement-4.pdf]

# rotavirus

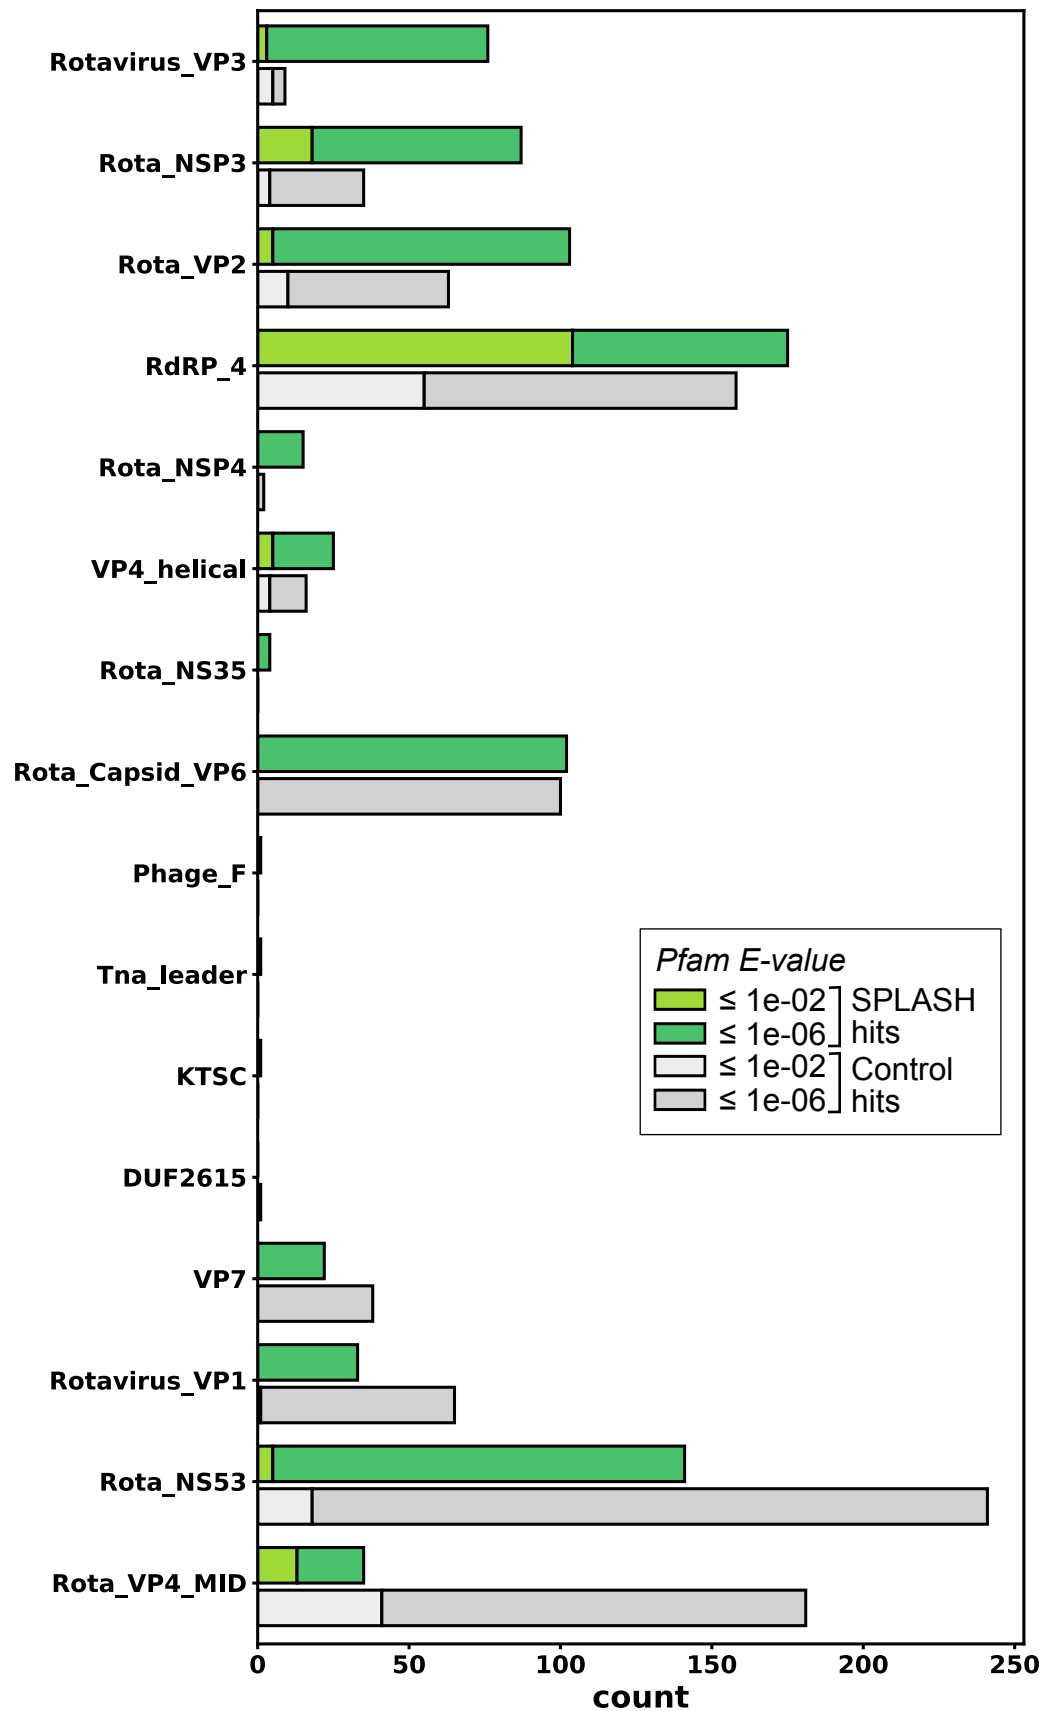

Supplement: NIHMS1949160-supplement-5.pdf [file NIHMS1949160-supplement-5.pdf]

**A**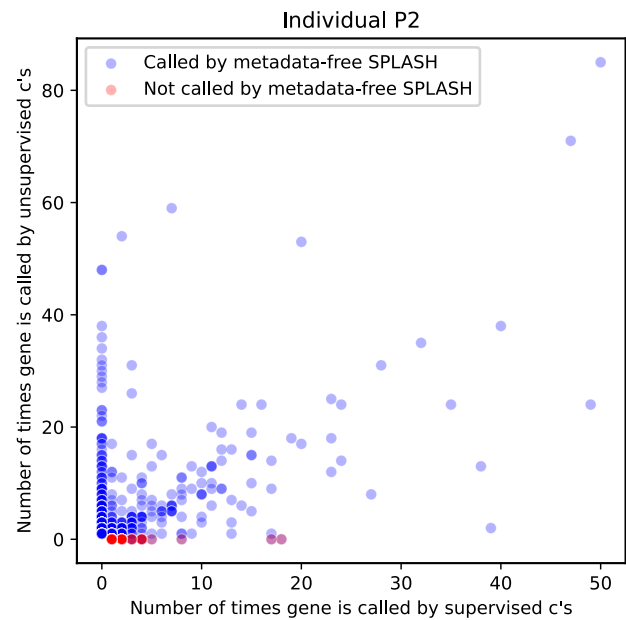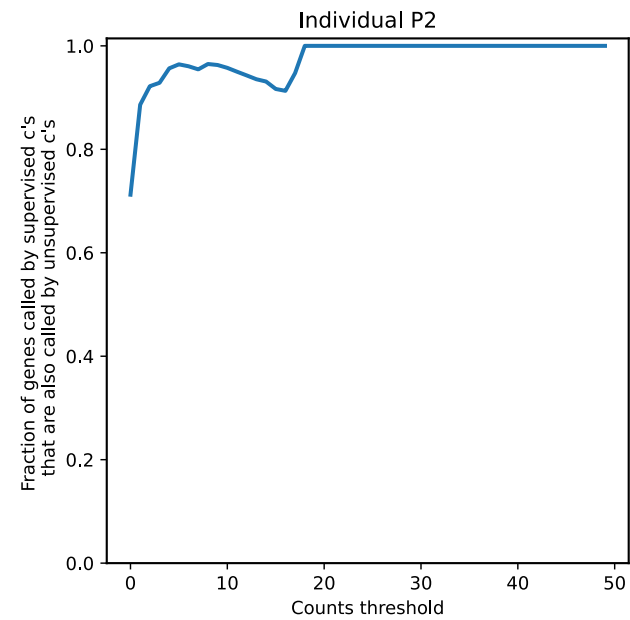**B**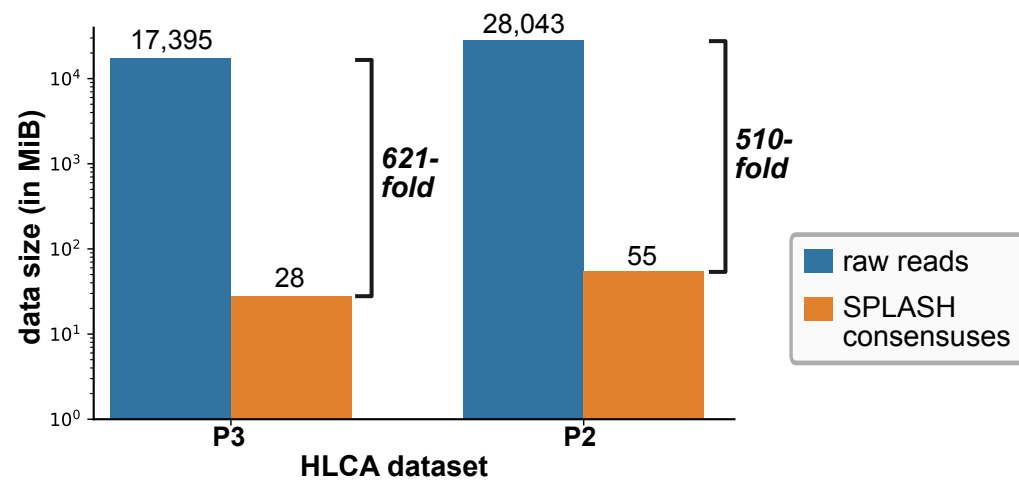

Supplement: NIHMS1949160-supplement-6.pdf [file NIHMS1949160-supplement-6.pdf]

# MYL6

anchor (for both individuals)  
AAGTCCTCAGCCATTCAGCACCATGC

## A

### individual P2

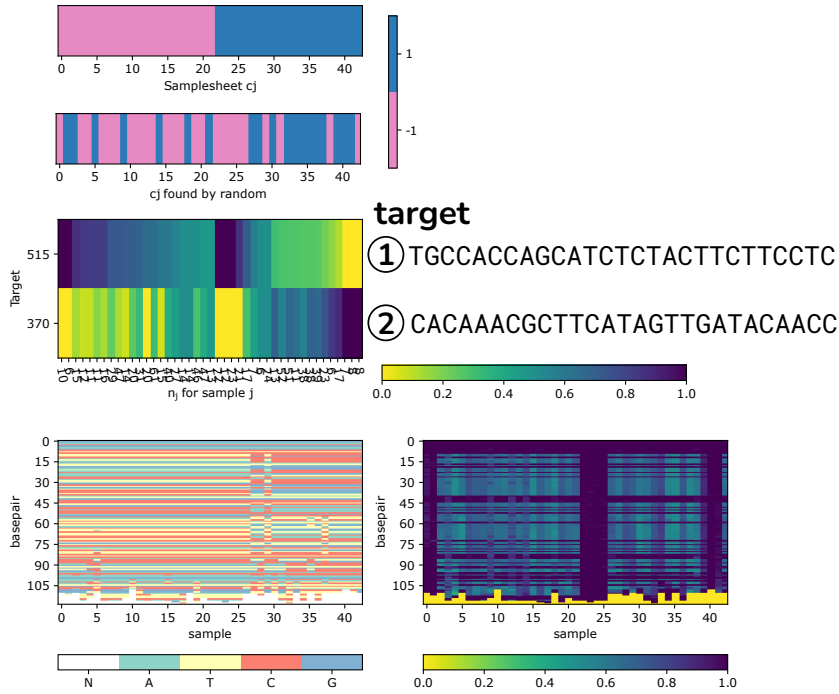

### individual P3

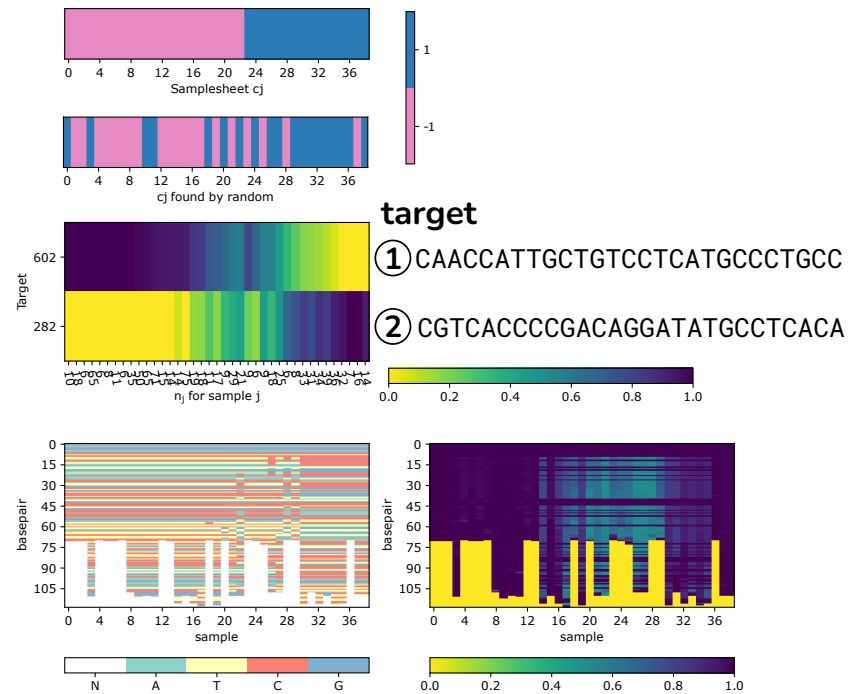

## B

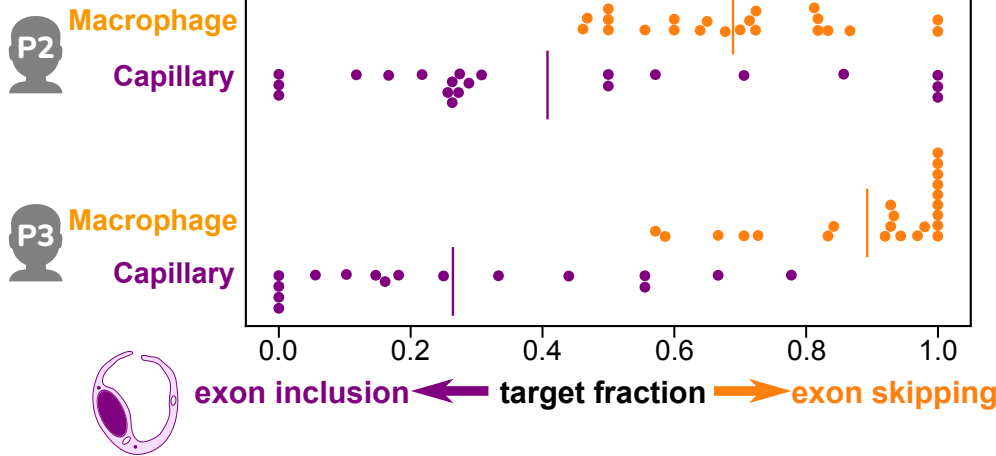

## C

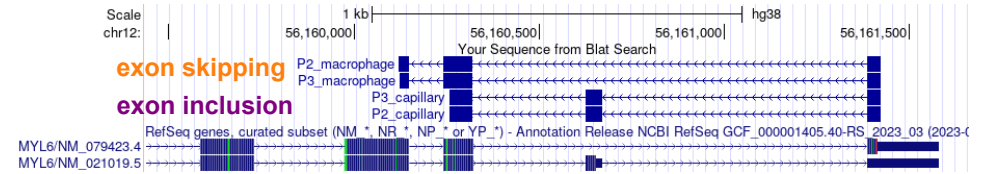

Supplement: NIHMS1949160-supplement-7.pdf [file NIHMS1949160-supplement-7.pdf]
